# Supplementary material for: Sodium Energetic Cycle in the Natronophilic Bacterium Thioalkalivibrio versutus
Source: MDPI journal article supplement (doi:10.3390/ijms23041965), 2022-02-10
Supplement: s1 [file s1]

# Sodium Energetic Cycle in the Natronophilic Bacteria *Thioalkalivibrio versutus*

Maria S. Muntyan<sup>1,\*</sup>, Mikhail B. Viryasov<sup>1</sup>, Dimitry Y. Sorokin<sup>2,3</sup> and Vladimir P. Skulachev<sup>1</sup>

<sup>1</sup> Belozersky Institute of Physico-Chemical Biology, Lomonosov Moscow State University, Leninskie gory, 119991 Moscow, Russian Federation; viryasov@genebee.msu.ru; skulach@genebee.msu.ru

<sup>2</sup> Winogradsky Institute of Microbiology, Federal Research Centre of Biotechnology, Russian Academy of Sciences, 117312 Moscow, Russian Federation; soroc@inmi.ru

<sup>3</sup> Department of Biotechnology, Delft University of Technology, 2628 BC Delft, The Netherlands

\* Correspondence: muntyan@genebee.msu.ru

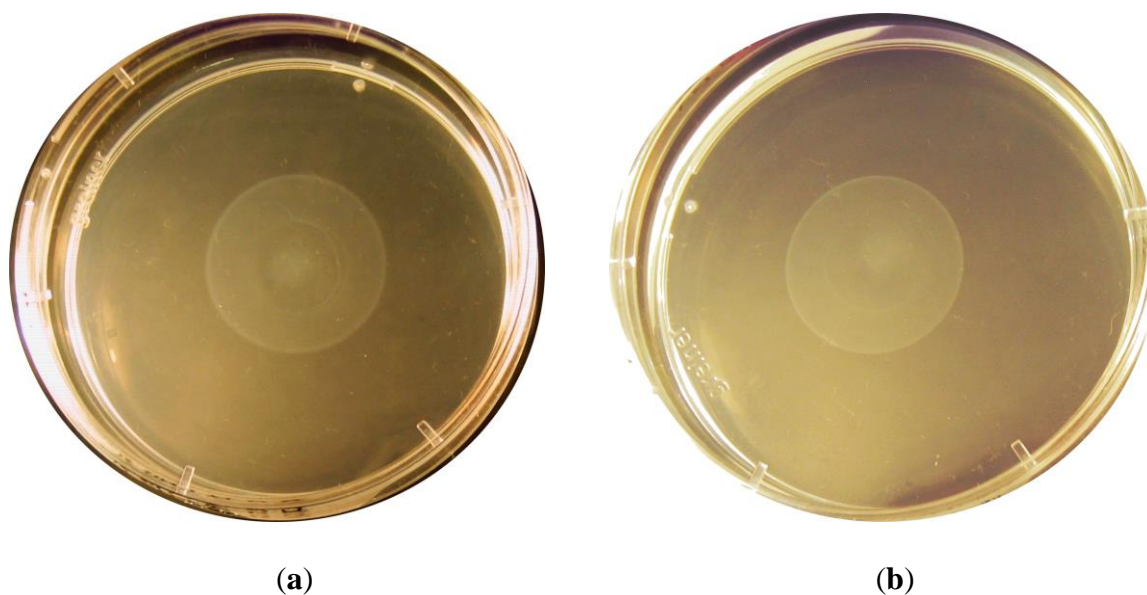

Figure S1. Formation of the bacterial swimming rings by the passaged *Thioalkalivibrio versutus* cells 19 h after inoculation: (a,b), Two different Petri dishes inoculated with the passaged bacterial cells only are shown (for details, see "Materials and Methods").
